# Supplementary material for: MurSS: A Multi-Resolution Selective Segmentation Model for Breast Cancer
Source: MDPI journal article supplement (doi:10.3390/bioengineering11050463), 2024-05-07
Supplement: s1 [file s1]

# Supplementary

MurSS: Multi-resolution Selective Segmentation Model for Breast  
Cancer

**Table S1. Validation Result from the Best Epoch.** This section presents the validation performance of multiple deep-learning models. Validation exhibits a comparable trend to Test, with the highest performance achieved on MurSS with a coverage ratio of 0.8. MurAN also performs well by overall measure compared to other deep learning models.

| Model        | Magnification<br>(Coverage ratio) | Overall Measure |               | Intersection over Union (IoU) |               |               |
|--------------|-----------------------------------|-----------------|---------------|-------------------------------|---------------|---------------|
|              |                                   | Accuracy (%)    | mIoU          | Benign                        | DCIS          | IDC           |
| UNet         | 50x                               | 92.90           | 0.7426        | 0.9118                        | 0.4944        | 0.8216        |
| UNet         | 25x                               | 93.56           | 0.7669        | 0.9165                        | 0.5473        | 0.8370        |
| UNet         | 12.5x                             | 90.44           | 0.6906        | 0.8721                        | 0.4404        | 0.7593        |
| HRNet        | 50x                               | 94.88           | 0.7431        | 0.9272                        | 0.4332        | 0.8689        |
| DeepLabV3    | 50x                               | 94.35           | 0.7209        | 0.9223                        | 0.3848        | 0.8556        |
| ICNet        | 50x, 25x, 12.5x                   | 93.43           | 0.7864        | 0.9118                        | 0.6050        | 0.8425        |
| DMMN         | 50x, 25x, 12.5x                   | 93.56           | 0.7693        | 0.9166                        | 0.5490        | 0.8424        |
| MurAN        | 50x, 12.5x                        | 96.33           | 0.8151        | 0.9455                        | 0.5950        | 0.9049        |
| Murss        | 50x, 12.5x (0.95)                 | 98.04           | 0.8499        | 0.9717                        | 0.6298        | 0.9483        |
| MurSS        | 50x, 12.5x (0.90)                 | 98.23           | 0.8579        | 0.9742                        | 0.6459        | 0.9537        |
| <b>MurSS</b> | <b>50x, 12.5x (0.80)</b>          | <b>99.36</b>    | <b>0.9114</b> | <b>0.9911</b>                 | <b>0.7616</b> | <b>0.9815</b> |

**Table S2. Test Result Statistical Analysis.** 95% Confidence Intervals (CIs) are calculated using 95 reconstructions and 1000 bootstraps about the performance difference (Model 1 - Model 2) per slide to evaluate the superiority between the models. When comparing MurAN to other models, we found that it did not show statistically significant performance superiority compared to DeepLabV3 and HRNet models. However, it did show a statistically significant difference compared to U-Net, ICNet, and DMMN models. For MurSS, we observed statistically significant performance gains in pixel-level accuracy and mIoU compared to the other deep learning models.

| Model 1         | Model 2   | 95% CI Accuracy difference<br>(lower, upper (%p)) | 95% CI mIoU difference<br>(lower, upper) |
|-----------------|-----------|---------------------------------------------------|------------------------------------------|
| MurAN           | UNet      | 0.48, 1.46                                        | 0.0065, 0.0353                           |
|                 | DeepLabV3 | -0.17, 0.54                                       | -0.0173, 0.0133                          |
|                 | HRNet     | -0.05, 0.56                                       | -0.0129, 0.0174                          |
|                 | ICNet     | 1.05, 1.63                                        | 0.0229, 0.0487                           |
|                 | DMMN      | 1.03, 1.82                                        | 0.0242, 0.0546                           |
| MurSS<br>(0.95) | UNet      | 1.44, 2.57                                        | 0.0292, 0.0646                           |
|                 | DeepLabV3 | 0.93, 1.63                                        | 0.0120, 0.0459                           |
|                 | HRNet     | 0.82, 1.66                                        | 0.0057, 0.0436                           |
|                 | ICNet     | 2.03, 2.74                                        | 0.0478, 0.0772                           |
|                 | DMMN      | 2.03, 2.91                                        | 0.0488, 0.0840                           |

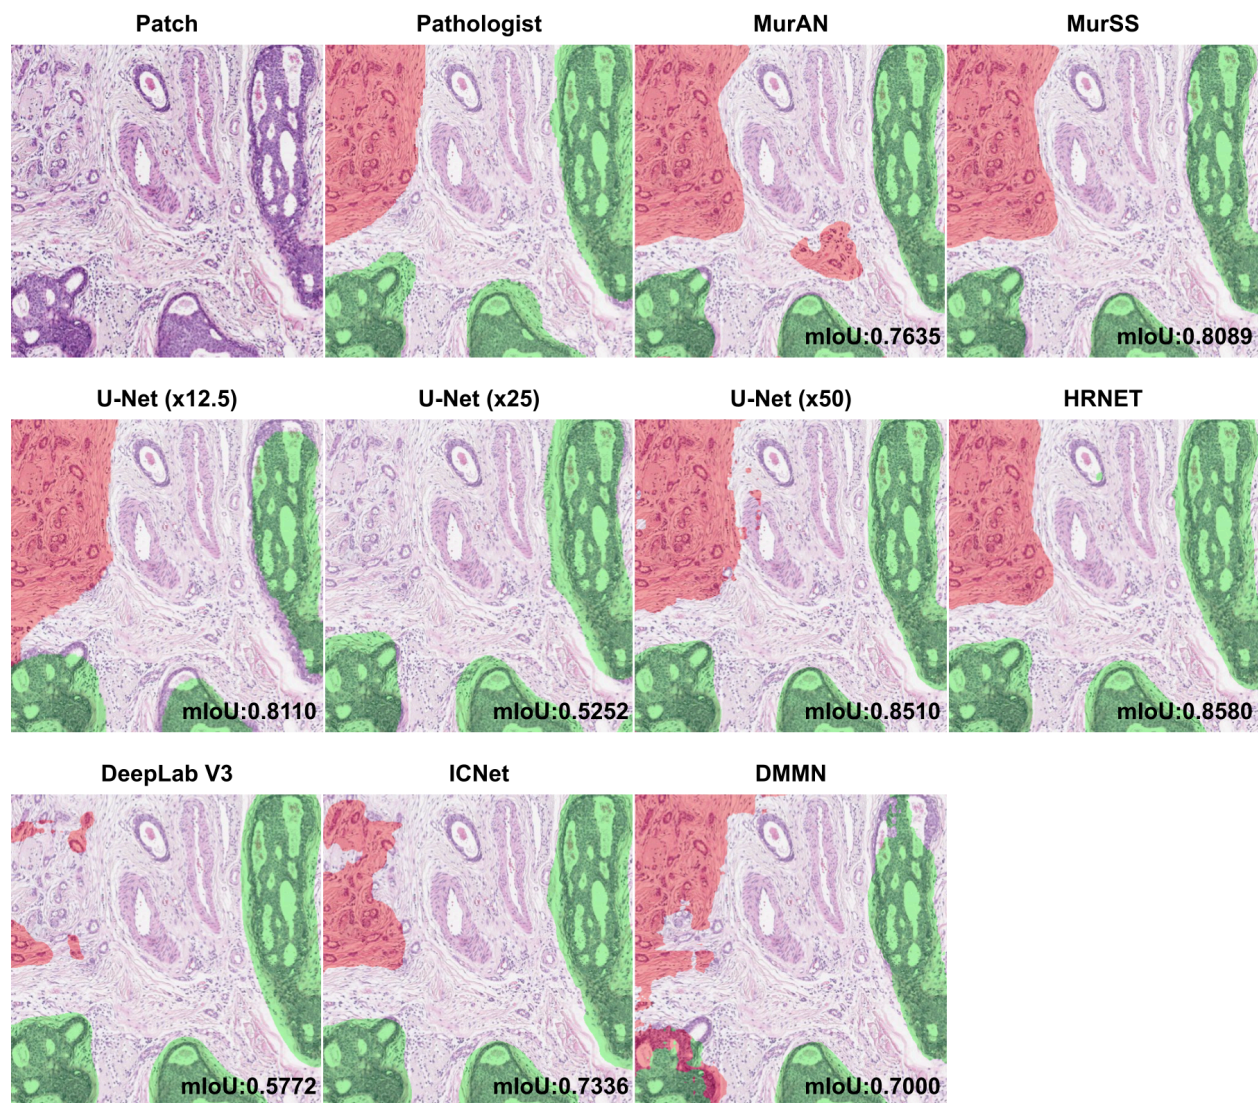

**Figure S1 (a) Visualization Results.** Pathologists and all deep learning models were compared. The mIoU was measured at the patch level. Green areas represented DCIS, and red areas represented IDC.



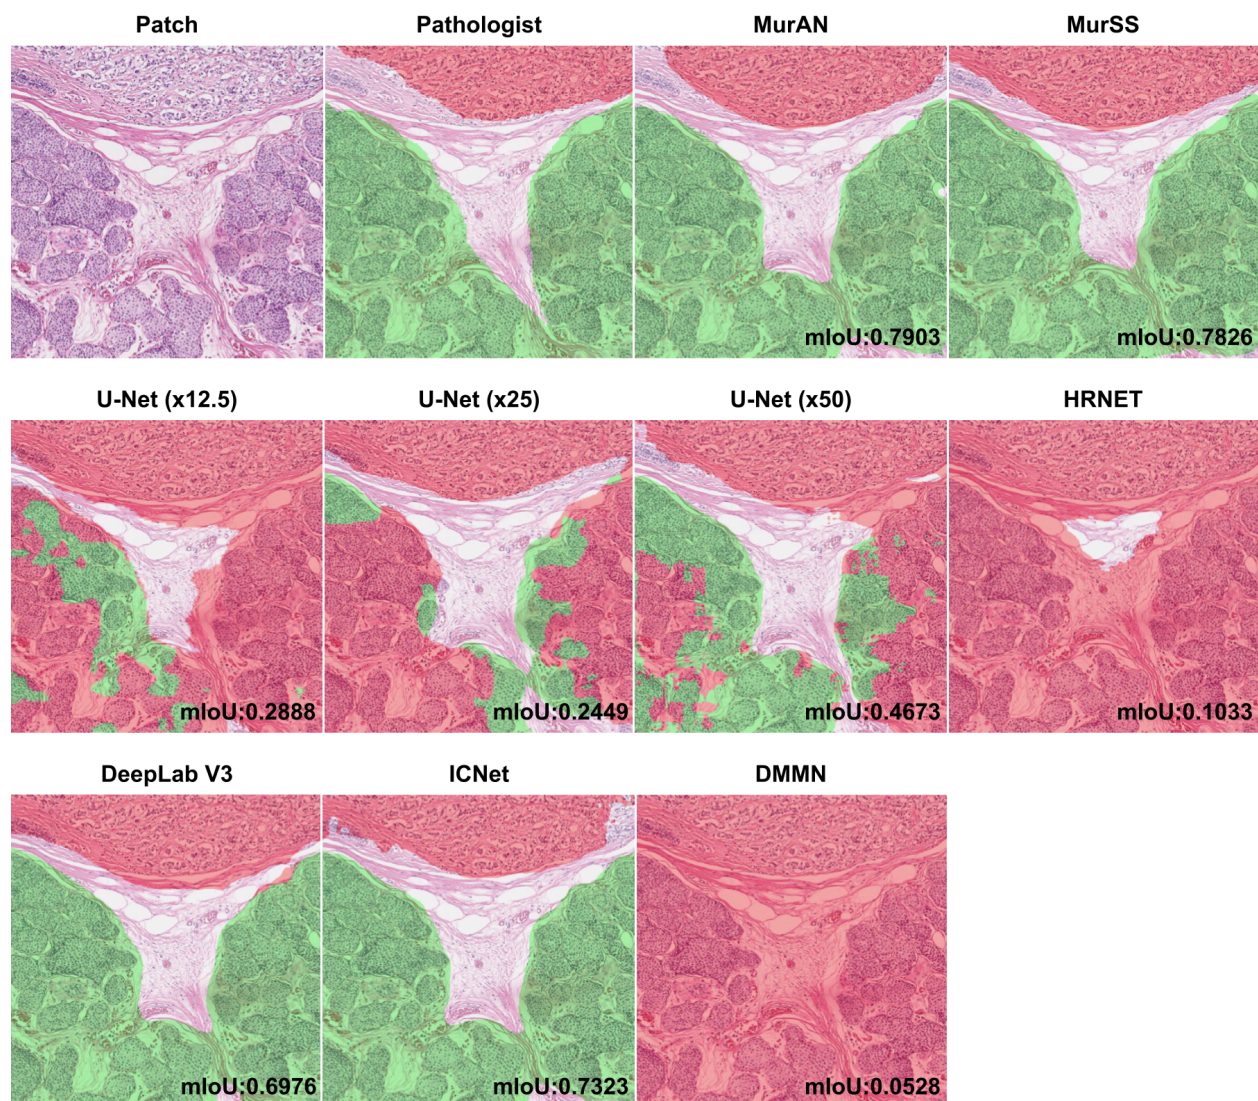

**Figure S1 (b) Visualization Results.** Pathologists and all deep learning models were compared. The mIoU was measured at the patch level. Green areas represented DCIS, and red areas represented IDC.



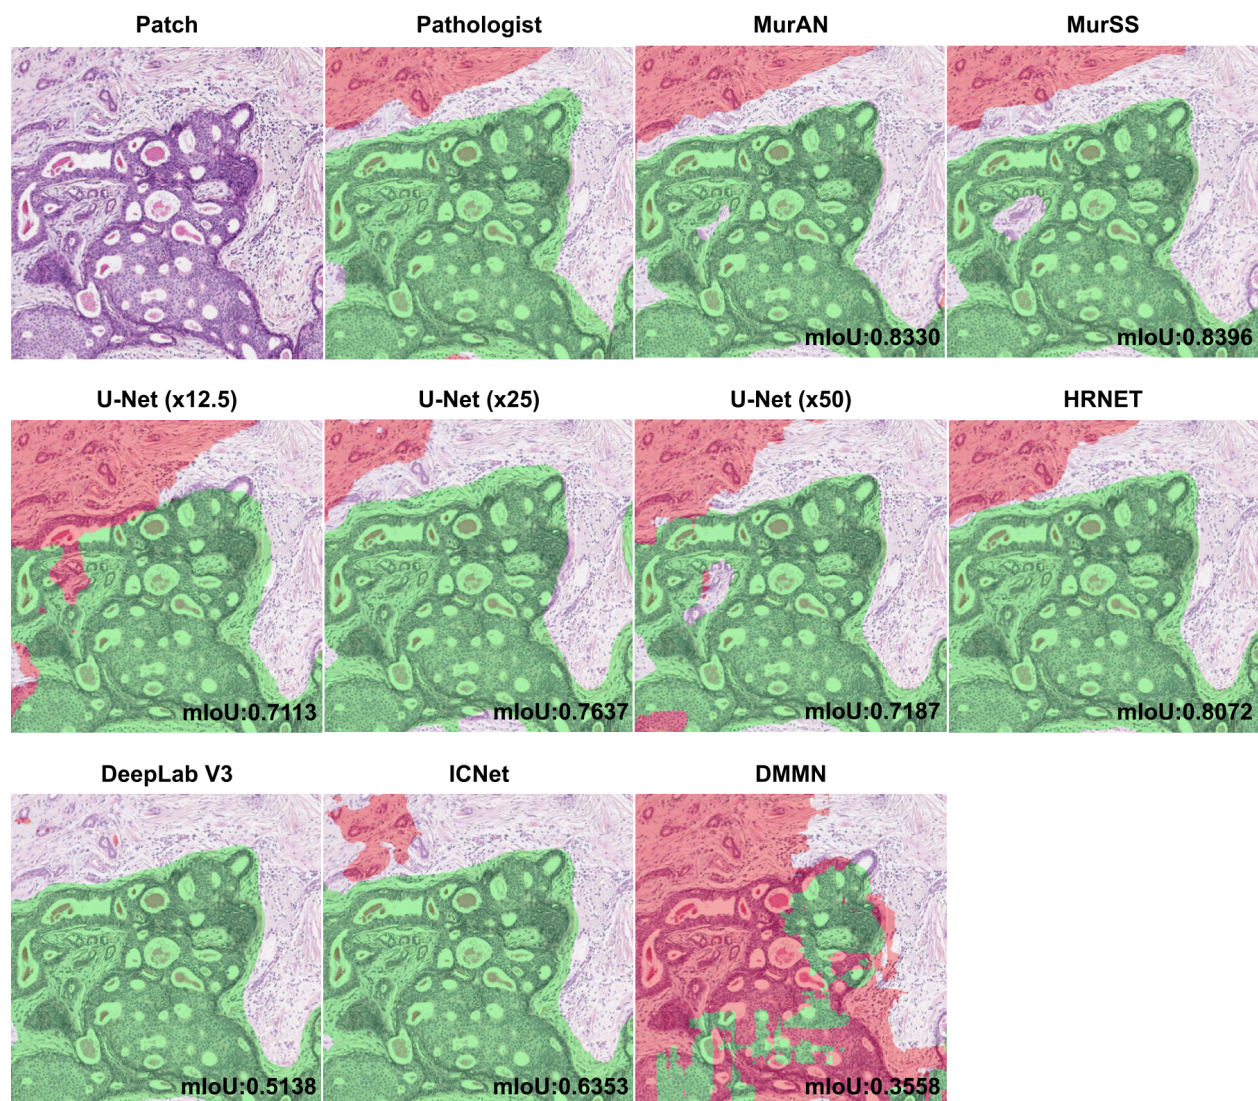

**Figure S1 (c) Visualization Results.** Pathologists and all deep learning models were compared. The mIoU was measured at the patch level. Green areas represented DCIS, and red areas represented IDC.

**Table S3. Sampled Test about Oversampling DCIS.** One hundred one slides from the TCGA dataset were selected where the annotations made by the teachers were similar. Fifty-one slides were for training, and the remaining fifty were divided equally for validation and testing. Multiple oversampling for DCIS patches due to their significantly low number of data. The same patches are utilized multiple times based on the oversample ratio. Subsequently, hard augmentations were implemented, including flipping, rotating, blurring, cropping, color jittering, and so forth. Significant performance gains were observed, up to seven-teen oversampling for DCIS. However, no further significant performance gains were observed beyond this point.

| MurAN<br>Oversampling<br>DCIS | Overall Measure |       | Intersection over Union (IoU) |       |       |
|-------------------------------|-----------------|-------|-------------------------------|-------|-------|
|                               | ACC (%)         | mIoU  | Benign                        | DCIS  | IDC   |
| 1 times                       | 96.2            | 0.765 | 0.945                         | 0.438 | 0.902 |
| 9 times                       | 96.2            | 0.773 | 0.945                         | 0.471 | 0.903 |
| 17 times                      | 96.2            | 0.775 | 0.945                         | 0.479 | 0.902 |
| 25 times                      | 96.2            | 0.772 | 0.945                         | 0.475 | 0.903 |
| 33 times                      | 96.2            | 0.774 | 0.946                         | 0.473 | 0.903 |
| 33 times                      | 96.2            | 0.774 | 0.946                         | 0.472 | 0.902 |
| 41 times                      | 96.2            | 0.773 | 0.945                         | 0.471 | 0.903 |

**Table S4. Sampled Test about Weighted Cross Entropy Loss.** One hundred one slides from the TCGA dataset were selected where the annotations made by the teachers were similar. Fifty-one slides were for training, and the remaining fifty were divided equally for validation and testing. We attempted to balance the data by using weighted cross-entropy loss with nine oversampling for DCIS. However, as shown in the table below, this did not significantly improve performance.

| MurAN<br>Weight ratio | Overall Measure |       | Intersection over Union (IoU) |       |       |
|-----------------------|-----------------|-------|-------------------------------|-------|-------|
|                       | ACC (%)         | mIoU  | Benign                        | DCIS  | IDC   |
| 1:1:1                 | 96.2            | 0.773 | 0.945                         | 0.471 | 0.903 |
| 1:3:3                 | 95.7            | 0.766 | 0.938                         | 0.465 | 0.894 |
| 1:9:9                 | 94.7            | 0.747 | 0.922                         | 0.444 | 0.873 |
| 1:13:13               | 94.3            | 0.738 | 0.915                         | 0.434 | 0.915 |
| 1:3:1                 | 96.1            | 0.773 | 0.944                         | 0.476 | 0.900 |
| 1:9:1                 | 96.1            | 0.765 | 0.945                         | 0.448 | 0.902 |

**Table S5. Sampled Test about Data Uncertainty.** One hundred one slides from the TCGA dataset were selected where the annotations made by the teachers were similar. Fifty-one slides were for training, and the remaining fifty were divided equally for validation and testing. The experiment was conducted at nine times the oversampling rate compared to DCIS. MurAN + data involved removing regions with different annotation labels between pathologists and poor slide-quality patches during the training and evaluation of MurAN. We also added DCIS data by reducing the stride when extracting patches from WSIs.

| Model        | Overall Measure |       | Intersection over Union (IoU) |       |       |
|--------------|-----------------|-------|-------------------------------|-------|-------|
|              | ACC (%)         | mIoU  | Benign                        | DCIS  | IDC   |
| MurAN        | 96.2            | 0.773 | 0.945                         | 0.471 | 0.903 |
| MurAN + data | 96.0            | 0.789 | 0.942                         | 0.527 | 0.899 |
